# Supplementary material
Source: MDPI journal article supplement (https://www.mdpi.com/2073-4344/13/3/632)
Supplement: s1 [file s1]

# Effect of MgFe-LDH with Reduction Pretreatment on the Catalytic Performance in Syngas to Light Olefins

Jie Li <sup>1</sup>, Changxiao Li <sup>1</sup>, Qiong Tang <sup>1</sup>, Zhijun Zuo <sup>2,\*</sup>, Lei Liu <sup>1,\*</sup> and Jinxiang Dong <sup>1</sup>

<sup>1</sup> College of Chemical Engineering and Technology, Taiyuan University of Technology, Taiyuan 030024, China; lj19960323a@163.com (J.L.); lcx2940162749@163.com (C.L.); monanfan@163.com (Q.T.); dongjinxiangwork@hotmail.com (J.D.)

<sup>2</sup> State Key Laboratory of Clean and Efficient Coal Utilization, Taiyuan University of Technology, Taiyuan 030024, China

\* Correspondence: zuozhijun@tyut.edu.cn (Z.Z.); liulei@tyut.edu.cn (L.L.)

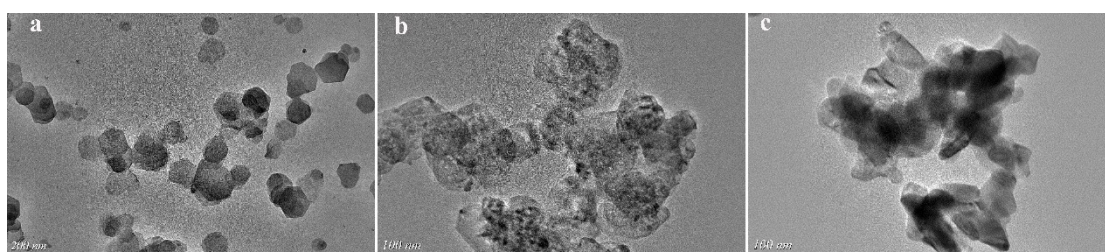

Figure S1. HRTEM images of the catalysts: a. MgFe-LDH, b. Fe-400, c. Fe-600.

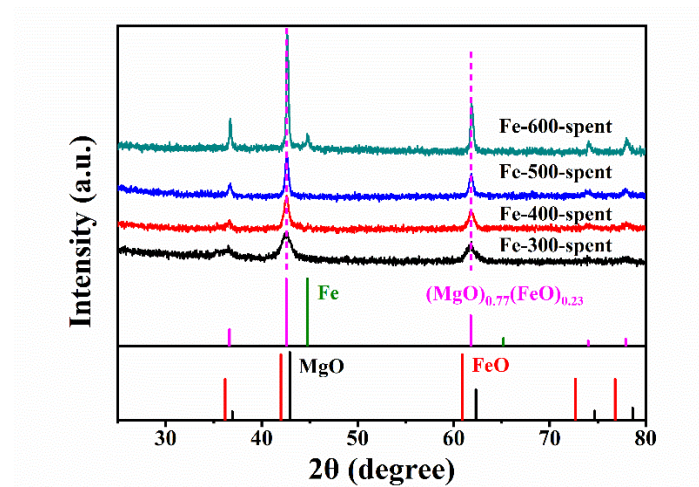

Figure S2. XRD patterns of the spent catalysts.

Table S1. Comparison of the catalytic performance with the previous works.

| Catalyst                                         | T (°C) | P (MPa) | GHSV (h <sup>-1</sup> ) | CO conv. (%) | CO <sub>2</sub> sel. (%) | Olefins sel. <sup>c</sup> (%) | Ref. |
|--------------------------------------------------|--------|---------|-------------------------|--------------|--------------------------|-------------------------------|------|
| Fe/α-Al <sub>2</sub> O <sub>3</sub>              | 340    | 2.0     | 1500                    | 80           | 40                       | 53 <sup>a</sup>               | [8]  |
| Fe-K/NCNTs                                       | 300    | 0.1     | 4200                    | 16.5         | 23.6                     | 54.6 <sup>a</sup>             | [26] |
| Mn/Fe <sub>3</sub> O <sub>4</sub>                | 320    | 1.0     | 4480                    | 41.5         | 37.8                     | 60.1 <sup>a</sup>             | [27] |
| Fe <sub>3</sub> O <sub>4</sub> @MnO <sub>2</sub> | 280    | 2.0     | 3000                    | 67.9         | 47.1                     | 79.3 <sup>b</sup>             | [13] |
| KFe@C                                            | 340    | 2.0     | 30000                   | ~82          | 47.4                     | 44.6 <sup>a</sup>             | [14] |
| Fe/hNCNC                                         | 350    | 0.1     | 12000                   | 3.5          | 39.4                     | 54.1 <sup>a</sup>             | [28] |

|                          |     |     |      |      |      |                   |           |
|--------------------------|-----|-----|------|------|------|-------------------|-----------|
| FeMn@Si-c                | 320 | 3.0 | 4000 | 56.1 | 13.0 | 75 <sup>b</sup>   | -[66]     |
| ZnCrO <sub>x</sub> /SAPO | 400 | 2.5 | 6828 | 17   | ~45  | 80 <sup>a</sup>   | [17]      |
| MnO <sub>x</sub> /SAPO   | 400 | 2.5 | 4800 | 8.5  | 41   | 79.2 <sup>a</sup> | -[67]     |
| ZnZrO <sub>x</sub> /SAPO | 400 | 1.0 | 3600 | 9.5  | 45   | 63 <sup>a</sup>   | [18]      |
| CoMn                     | 250 | 0.1 | 2000 | 31.8 | 47.3 | 60.8 <sup>a</sup> | [12]      |
| Fe-500                   | 330 | 2.0 | 1000 | 47   | 48   | 51 <sup>a</sup>   | This work |

<sup>a</sup> Light olefins; <sup>b</sup> Total olefins; <sup>c</sup> Olefins selectivity in hydrocarbons.

17

18
